# Supplementary material for: The first example of enantioselective isocyanosilylation of meso epoxides with TMSCN catalyzed by novel chiral organogallium and indium complexesElectronic supplementary information (ESI) available: Characterization data, chiral analysis and determination of absolute configuration. See http://www.rsc.org/suppdata/cc/b2/b212511k/
Source: Royal Society of Chemistry journal article supplement (doi:10.1039/b212511k), 2003-02-13
Supplement: b212511k.doc [file b212511k.doc]

**Electronic Supplementary Information**

**The first example of enantioselective isocyanosilylation of *meso* epoxides with TMSCN catalyzed by novel chiral organogallium and indium complexes**

**Chengjian Zhu*a,b, Fang Yuana, Weijin Gua, Yi Pan*a**

*a Department of Chemistry, Nanjing University, Nanjing 210093, China. E-mail:* [*cjzhu@netra.nju.edu.cn*](mailto:cjzhu@netra.nju.edu.cn) *and yipan@nju.edu.cn.*

*b State Key Laboratory of Organometallic Chemistry, Shanghai Institute of Organic Chemistry, Chinese Academy of Sciences, Shanghai 200032, China*

**Analytical data for Complexes** **I**–**VI**:

Complex **I**: 1H NMR (CDCl3, 300 MHz): δ 7.94-7.83 (m, 4H), 7.40-6.95 (m, 8H), 3.64 (s, 3H), -0.92 (s, 6H). IR (KBr): ν = 2959 (w), 1619 (m), 1507 (m), 1459 (m), 1263 (m), 1218 (s), 1084 (m), 805 (m), 748 (s) cm-1. MS (70eV, m/z): 383 (1), 314 (16), 300 (100), 285 (14), 268 (33), 240 (30), 227 (17), 99 (38). Anal.: Calcd. For C23H21Ga O2: C 69.17, H 5.26. Found: C 69.23, H 5.58.

Complex **II**: 1H NMR (CDCl3, 300 MHz): δ 7.81-7.75 (m, 4H), 7.46-6.84 (m, 8H), 3.52 (s, 3H), -0.79 (s, 6H). IR (KBr): ν = 2931 (w), 1588 (m), 1503 (m), 1457 (m), 1352 (m), 1232 (s), 973 (m), 808 (m), 685 (s) cm-1. MS (70eV, m/z): 414 (18), 342 (1), 300 (100), 268 (36), 239 (22), 228 (12), 145 (24), 115 (28). Anal.: Calcd. For C23H21InO2: C 62.16, H 4.73. Found: C 62.16, H 4.68.

Complex **III**: 1H NMR (CDCl3, 300 MHz): δ 7.91-7.84 (m, 4H), 7.39-6.82 (m, 13H), 4.90 (d, J = 6Hz, 2H), -0.98 (s, 6H). IR (KBr): ν = 2960 (w), 1600 (m), 1490 (m), 1440 (m), 1310 (m), 1240 (s), 1100 (m), 790 (m), 730 (s) cm-1. MS (70eV, m/z): 466 (1), 376 (69), 285 (100), 270 (25), 257 (18), 240 (26), 230 (23), 91 (99). Anal.: Calcd. For C29H25Ga O2: C 73.26, H 5.26. Found: C 73.42, H 5.31.

Complex **IV**: 1H NMR (CDCl3, 300 MHz): δ 7.89-7.75 (m, 4H), 7.30-6.60 (m, 13H), 4.76 (d, J = 4.7Hz, 2H), -0.86 (s, 6H). IR (KBr): ν = 2921 (w), 1617 (m), 1503 (m), 1454 (m), 1351 (m), 1260 (s), 1145 (m), 861 (m), 730 (s) cm-1. MS (70eV, m/z): 466 (11), 376 (52), 285 (69), 239 (18), 229 (12), 145 (12), 91 (100). Anal.: Calcd. For C29H25InO2: C 66.92, H 4.81. Found: C 66.69, H 4.68.

Complex **V**: 1H NMR (CDCl3, 300 MHz): δ 7.81-7.72 (m, 4H), 7.40-7.05 (m, 8H), 0.82 (s, 9H), -0.91 (s, 6H). IR (KBr): ν = 2962 (w), 1650 (m), 1509 (m), 1459 (m), 1263 (m), 1208 (s), 1077 (m), 801 (m), 745(s) cm-1. MS (70eV, m/z): 356 (6), 342 (100), 285 (32), 201 (12), 149 (21), 57 (12). Anal.: Calcd. For C26H27GaO2: C 70.75, H 6.12. Found: C 70.82, H 6.27.

Complex **VI**: 1H NMR (CDCl3, 300 MHz): δ 7.80-7.74 (m, 4H), 7.46-6.95 (m, 8H), 0.81 (s, 9H), -0.76 (s, 6H). IR (KBr): ν = 2971 (w), 1618 (m), 1503 (m), 1427 (m), 1235 (m), 1161 (s), 861 (m), 749(s) cm-1. MS (70eV, m/z): 486 (1), 342 (11), 286 (100), 239 (13), 145 (21), 56 (14). Anal.: Calcd. For C26H27InO2: C 64.20, H 5.56. Found: C 64.32, H 5.79.

***β*-isocyanocyclohexanol**

According to the general protocol, the reaction of *meso* cyclohexene oxide and trimethylsilyl cyanide afforded the title compound as a white solid. HPLC (DAICEL CHIRALPAK OD-H, n-hexane/i-PrOH = 100:0.5): Rt = 10.25 min, 12.25 min. - 1H NMR (CDCl3, 300 MHz): δ 3.84-3.31 (m, 2H), 2.66 (s, 1H), 2.18-1.18 (m, 8H). IR (KBr): ν = 3347, 2147 cm-1.

***β*-isocyanocyclooctanol**

According to the general protocol, the reaction of *meso* cyclooctene oxide and trimethylsilyl cyanide afforded the title compound as a colorless liquid. HPLC (DAICEL CHIRALPAK OD-H, n-hexane/i-PrOH = 100:0.5): Rt = 10.13 min, 12.04 min. - 1H NMR (CDCl3, 300 MHz): δ 4.02-3.14 (m, 2H), 1.73-0.90 (m, 12H). IR (KBr): ν = 3446, 2137cm-1.

***β*-isocyanonorbonylanol**

According to the general protocol, the reaction of norbonylene oxide and trimethylsilyl cyanide afforded the title compound as a colorless liquid. HPLC (DAICEL CHIRALPAK OD-H, n-hexane/i-PrOH = 100:0.5): Rt = 17.88 min, 19.83 min. - 1H NMR (CDCl3, 300 MHz): δ 4.98-3.31 (m, 2H), 2.25-1.08 (m, 8H). IR (KBr): ν = 3386, 2143cm-1.

**2-aminocyclohexanol**

Adapting literature procedure12, the *β*-isocyanocyclohexanol which is the product catalyzed by complex **3** (Entry 3) can be converted to the title compound. – 1H NMR (CDCl3, 300 MHz,): δ 3.13 (m, 1H), 2.77 (m, 2H), 2.46 (m, 1H), 2.20-0.90 (m, 8H). IR (KBr): ν = 3400-2800 (b), 1570 (m), 1450 (m), 1350 (m), 1080 (s) cm-1. [α]D20 -8˚ (c 0.5, H2O) (lit.13a [α]D25–15.9˚ (c 1.3, H2O))

**2-aminocyclooctanol**

Adapting literature procedure12, the *β*-isocyanocyclooctanol which is the product catalyzed by complex **3** (Entry 13) can be converted to the title compound. –  1H NMR (CDCl3, 300 MHz,): δ 3.30 (m, 1H), 2.65 (m, 1H), 1.95-1.42 (m, 15H). IR (KBr): ν = 3350-2850 (b), 1580 (m), 1420 (s), 1270 (s), 1060 (m), 1030 (m) cm-1. [α]D20 -11˚ (c 0.5, EtOH) (lit.13b [α]D -19˚ (c 0.765, EtOH))
